# Supplementary material
Source: JCI journal article supplement (doi:10.1172/jci157229)

Figure 2A

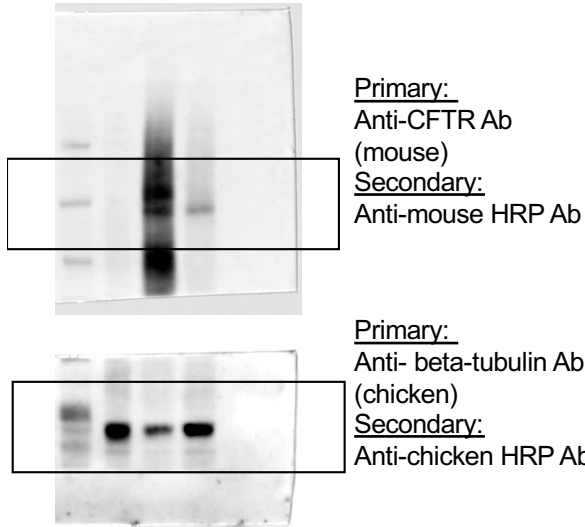

Figure 2B

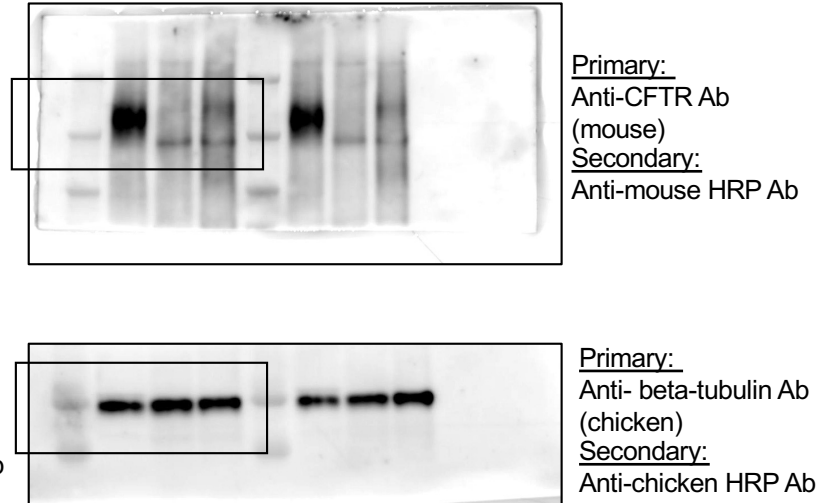

Figure 2C

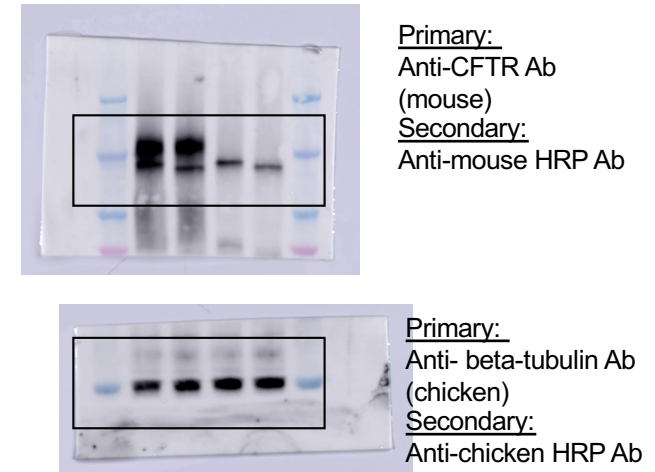

Figure 2D

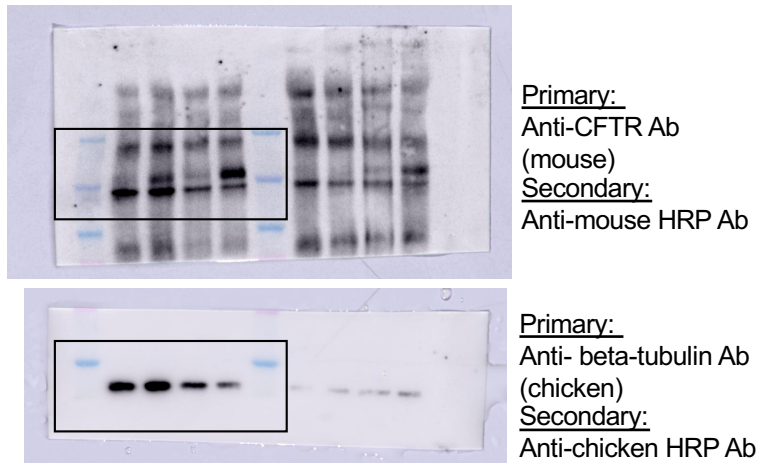

Figure 2E

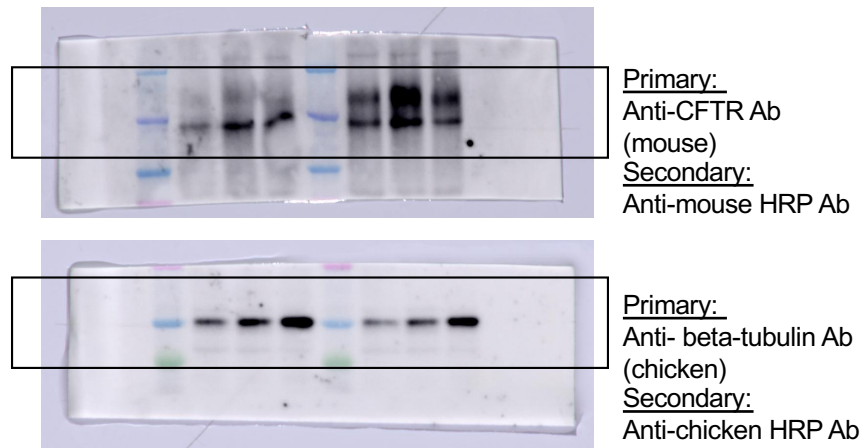

Supplement: sd1 [file 1]
